# Supplementary material for: C–S bond induced ultrafine SnS2 dot/porous g-C3N4 sheet 0D/2D heterojunction: synthesis and photocatalytic mechanism investigation
Source: Royal Society of Chemistry journal article supplement (doi:10.1039/c7dt03894a), 2017-01-01
Supplement: c7dt03894a1.pdf [file c7dt03894a1.pdf]

## Electronic Supplementary Information

### **C-S bonds induced ultrafine SnS<sub>2</sub> dots/ porous g-C<sub>3</sub>N<sub>4</sub> sheets 0D/2D heterojunction: synthesis and photocatalytic mechanism investigation**

Anquan Zhu <sup>#</sup>, Lulu Qiao <sup>#</sup>, Ziqi Jia, Pengfei Tan, Yi Liu, Yongjin Ma and Jun Pan\*

State Key Laboratory for Powder Metallurgy, Central South University, Changsha  
410083, P. R. China

<sup>#</sup> These authors contributed equally to this work.

\*corresponding author. Tel: +86-0731-88836646  
Email: [jun.pan@csu.edu.cn](mailto:jun.pan@csu.edu.cn) (Jun Pan)

## **Materials and Reagents**

Urea (AR, 99%) was obtained from Aladdin Industrial Corporation (Shanghai, China). L-Cysteine (99%) and Tin chloride pentahydrate (AR, 99%) were provided by Aladdin Industrial Corporation (Shanghai, China). Furthermore, ethanol (AR) and thioacetamide (AR) were purchased from Sinopharm Chemical Reagent Co., Ltd.

## **Photocatalysts characterization**

The morphologies and structures of as-prepared materials were explored using a field emission scanning electron microscope (Nova Nano SEM 230, FEI Co., Ltd.) with an acceleration voltage of 10 KV and transmission electron microscopy (TEM, JEM-2100F JEOL Ltd. Japan) with an acceleration voltage of 200 KV. X-ray powder diffraction patterns were recorded on an X-ray diffractometer (XRD; D/max 2550, Rigaku Corporation) with Cu K $\alpha$  radiation ( $\lambda=0.15405\text{nm}$ ). The surface chemical states were analyzed by X-ray photoelectron spectroscopy (ESCALAB 250Xi, ThermoFisher-VG Scientific), and the binding energies of all elements were calibrated through the C 1s peak (BE = 284.8 eV) as standard. Brunauer-Emmett-Teller (Quadrascorb SI-3MP) was tested at 77.3 K after degassed at 200 °C for 10 h. Fourier transform infrared spectra (FTIR) were measured on an infrared spectroscope (Nicolet 6700, Thermo Nicolet Corporation) in the range of 3800–400 cm<sup>-1</sup>, using KBr pellets as reference. The UV-Vis spectra and photocatalytic performances of the catalysts were obtained on a UV-Vis spectrometer (Evolution 220, Thermo Fisher Scientific). The photoluminescence (PL) spectra were measured on a fluorescence spectrophotometer (F-4600, Japan's Hitachi LTD).

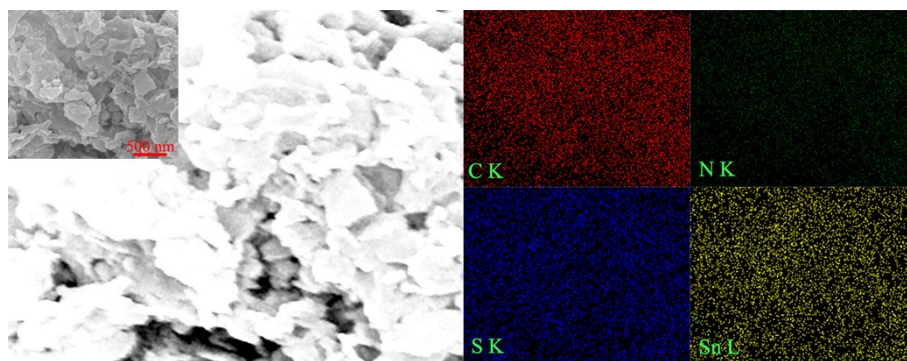

**Fig. S1.** SEM image of the SnS<sub>2</sub>/g-C<sub>3</sub>N<sub>4</sub> heterojunction and the corresponding elements mapping of C, N, S and Sn.

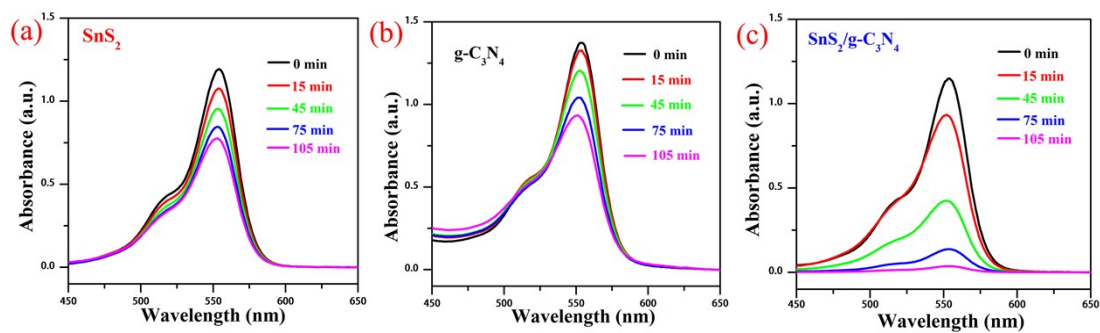

**Fig. S2.** The absorption spectral changes of RhB in the presence of pure SnS<sub>2</sub> (a), g-C<sub>3</sub>N<sub>4</sub> (b) and SnS<sub>2</sub>/g-C<sub>3</sub>N<sub>4</sub> heterojunction (c).

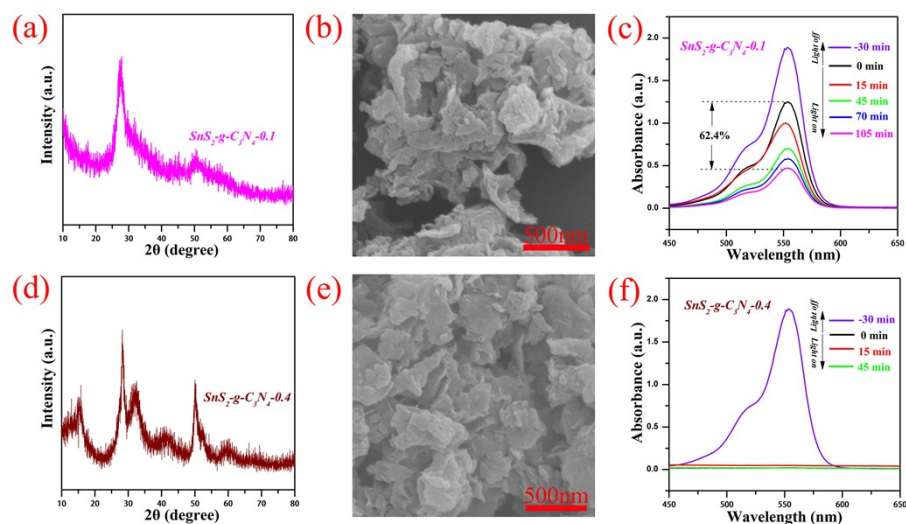

**Fig S3** The XRD pattern (a), SEM image (b) and the absorption spectral changes of RhB (c) for the sample  $\text{SnS}_2\text{-g-C}_3\text{N}_4\text{-0.1}$  (theoretical mass ratio:  $\text{SnS}_2/\text{g-C}_3\text{N}_4 = 0.1$ ); the XRD pattern (a), SEM image (b) and the absorption spectral changes of RhB (c) for the sample  $\text{SnS}_2\text{-g-C}_3\text{N}_4\text{-0.4}$ .
